# Supplementary material for: Synthesis, molecular modeling and biological activity of methyl and thiomethyl substituted pyrimidines as corticotropin releasing hormone type 1 antagonists
Source: Royal Society of Chemistry journal article supplement (doi:10.1039/b305458f), 2003-01-01
Supplement: b305458f.doc [file b305458f.doc]

**Supplementary data**

Synthesis, Molecular Modeling and Biological Activity of Methyl and Thiomethyl Substituted Pyrimidines as Corticotropin Releasing Hormone Type 1 Antagonists

Adam McCluskey,*a** Paul A Keller,*b** Jody Morgan*b* and James Garner*a*

a Chemistry, School of Environmental & Life Sciences, The University of Newcastle, Callaghan, NSW 2308, Australia. Fax: 61 24921 5472; Tel: 61 24921 6486; E-mail: amcclusk@mail.newcastle.edu.au

bDepartment of Chemistry, The University of Wollongong, Wollongong, NSW, Australia 2522. Fax: 612 4221 4287; Tel: 61 24221 4692; E-mail: paul_keller@uow.edu.au

# Hypothesis Generation Using Catalyst

The commercial program Catalyst has a well documented process of pharmacophore generation and statistical analyses to give indications of the validity of the hypotheses generated. While much of the statistical analysis is automatically generated, the interpretation of that output as well as bias from user input can greatly affect the outcome, and therefore interpretation of the results forms an important component of such studies. Below is a brief summary of this well documented process of the hypothesis generation and cost (statistical) analysis.

***Hypothesis Generation***

The generation of hypotheses (or pharmacophores – the terms are interchangeable) is a stepwise process with the input of data (ligand structure and associated biological activity) greatly affecting the outcome with the hypotheses are derived directly from the information provided by these ligands. For example, the compound training set by which the Catalyst software will base its analysis should consist of at least 16 compounds spanning 4 orders of magnitude of activity. Redundant data (i.e. compounds whose structural information – and therefore biological activity – essentially explain the same structure/activity outcome) should be removed as its inclusion can bias the output. The training set should not contain compounds known to be inactive due to steric interactions with the receptor, that is, exclusion volume problems, as Catalyst is not equipped to handle such cases as it does not have the capability to understand features that have a negative impact on activity.[[1]](#endnote-2) Inclusion of these compounds would therefore lead to a bias in the pharmacophore.[[2]](#endnote-3)

Once the compound selection for the training set is complete, conformational models are generated for each ligand within Catalyst using an algorithm developed specifically to ensure good coverage of conformational space within a minimal number of conformers.[[3]](#endnote-4) The program considers molecules as collections of energetically reasonable conformation.2 and generates a maximum of 256 different models, all within a specified energy range, and are selected so that differences in inter-function distances are maximized.3 These models become the input for Catalyst’s pattern recognition data in the pharmacophore generation process.3

Chemical features from the patterned array of structures and conformations are considered by Catalyst. A maximum of five features obtained, and can include hydrogen bond donors, hydrogen bond acceptors, hydrophobic features (aliphatic and aromatic) and ionisable groups to name a few. These chemical features are defined within Catalyst in a dictionary using the CHM language and are based on atomic characteristics.

The in-built HypoGen module is then able to use all this information, the training set, conformational models and chemical features, to generate the top ten scoring hypothesis models.1 This is performed in three phases:

1. The constructive phase generates hypotheses that are common among the most active compounds. This is done in several steps; first the most active compounds are identified, then all hypotheses among the two most active compounds are determined and stored, those that fit the remaining active compounds are kept.
2. The subtractive phase then removes the hypotheses that fit the inactive compounds as well. This is performed by determining the inactive compounds, defined as having an activity 3.5 orders of magnitude greater than the most active compound. Any hypothesis that matched more than half the compounds identified as being inactive is removed.
3. The final phase is the optimization phase. This involves each hypothesis undergoing small perturbations in an attempt to improve the cost of the model. Examples of some of the alterations include, rotating vectors attached to features, translating pharmacophore features, adding a new feature or removing a feature.

The ten highest scoring unique hypotheses are then exported. These ten returned hypothesis models are then analysed to determine the best model. This process involved the analysis of the mapping information (overlaying of compounds onto hypotheses), which details features that map accurately onto the hypothesis model for every compound in the training set, as well as a thorough cost analysis (statistical analysis) to determine which hypotheses are the most likely to be an accurate representation of the data.

## Mapping Analysis

The HypoGen module makes the assumption that an active molecule should map more features than an inactive molecule.1 Therefore a molecule should be inactive because it either does not contain an important feature, or misses the feature as it cannot be orientated correctly in space. Based on this assumption the most active compounds should map all features of the hypothesis model. The mapping information for all ten hypotheses for each compound in the training set is available in a log file, which also contains feature weights, tolerance values, type and location of each feature, as well as cost values.1 The mapping information shows the precise atom for each compound in the training set that maps onto the relevant pharmacophore feature. Where a feature fails to map on a compound an asterix appears. Where a hypothesis failed to match features for the most active compounds it was considered to be an inaccurate representation.

## Hypothesis Cost (Statistical) Analysis

The total cost and error cost are relative values to show the simplicity of the model.

A major assumption used within Catalyst in the generation of hypothesis models is based upon Ocram’s razor, which states that between otherwise equivalent alternatives, the simplest model is the best.2 This program assigns costs to hypotheses in terms of the number of bits required to generate them. The Total hypothesis cost is calculated using the three cost factors:

1. The weight cost - increases as the feature weights in a model deviate from an ideal value of two.
2. The error cost - increases as the RMS difference between the estimated and actual activities for the training set molecules increases.
3. Configuration cost - a fixed cost that depends on the complexity of the hypothesis space being optimized.

Therefore, the lower the cost of a hypothesis the less bits required to generate it and the simpler the model.

The correlation is the final method of analysis for the selection of the most accurate hypothesis model. By determining a regression graph for a hypotheses ability to predict an estimate activity versus the compounds actual activity for all compounds in the training set it is possible to determine a correlation value for the line of best fit.

## Hypothesis Validation

One method of validating the hypothesis model generated is via an analysis of the cost of generating the pharmacophore. The greater the difference between the null cost and the total cost the more statistically valid the hypothesis, and thus, the greater the probability of this model being a true representation of the data. This analysis process was used for the all the pharmacophore models generated. These theoretical cost values are measured in units of bits. The null cost is the cost of generating a hypothesis where the error cost is high. The total cost is the actual cost of hypothesis generation, and the fixed cost is where the error cost is minimal or where the pharmacophore is perfect.2

If the difference between the total cost and the null hypothesis cost is more than 60 bits, there is greater than 90% probability that the model is a true representation of the data. If the difference is 40-60 bits, there is a 75-90% chance that it represents a true correlation of the data. When the difference becomes less than 40 bits, the probability of the hypothesis being a true representation rapidly falls below 50% and if the total-null cost difference is less than 20 bits there is little chance of it being accurate and the training set should be reconsidered.1

1. Li, H.; Sutter, J.; Hoffmann, R. In *Pharmacophore Perception, Development, and Use in Drug Design*; Guner, O. F., Ed.; International University Line: California, 2000, p 173. [↑](#endnote-ref-2)
2. Sprague, P. *Hypothesis Generation in Catalyst*, www.msi.com/support.catalyst/ hypogen.html, 30/04/1999. [↑](#endnote-ref-3)
3. Sprague, P. W. *Perspectives in Drug Discovery and Design* **1995**, *3*, 1. [↑](#endnote-ref-4)
